# Supplementary material for: Percutaneous Closure of Mitral Paravalvular Leak: Long-Term Results in a Single-Center Experience
Source: MDPI journal article supplement (doi:10.3390/jcm11164835), 2022-08-18

**PERCUTANEOUS CLOSURE OF MITRAL PARAVALVULAR LEAK: LONG-TERM RESULTS**  
**IN A SINGLE-CENTER EXPERIENCE**

**SUPPLEMENTARY MATERIAL**

**Supplementary Table S1: Predictors of procedural success:**

| Factor                                 | P value             |                       |
|----------------------------------------|---------------------|-----------------------|
|                                        | Univariate analysis | Multivariate analysis |
| NYHA I-II vs III-IV                    | 0.046               | 0.093 (NS)            |
| HF vs HA indication                    | 0.002               | 0.054                 |
| Transfusion (yes/no)                   | 0.000               | 0.085 (NS)            |
| Location (multiple vs no multiple PVL) | 0.009               | 0.030                 |
| More than 2 previous surgeries         | 0.015               | NS                    |
| Basal hemoglobin                       | 0.063               | NS                    |
| Basal LDH                              | 0.000               | NS                    |
| Pulmonary hypertension                 | 0.135               | -                     |

Univariate analysis: Pulmonary hypertension, more than 2 previous surgeries, basal NYHA, HF vs HA indication, blood transfusion (yes/no), location (multiple vs no multiple PVL), basal hemoglobin, basal LDH.

**Supplementary Table S2: Predictors of major adverse cardiovascular events (MACE) during long-term follow-up:**

|                                 | P value | HR  | 95% Conf. Interval |
|---------------------------------|---------|-----|--------------------|
| CKD                             | 0.043   | 2.2 | 1.0 – 4.6          |
| 3 months HF previous admission  | 0.000   | 5.7 | 2.3 – 13.8         |
| First proc. Success             | 0.002   | 0.1 | 0.0 – 0.5          |
| Improve NYHA class at follow-up | 0.011   | 0.4 | 0.2 – 0.8          |
| HF vs HA indication             | 0.000   | 5.9 | 2.9 – 12.2         |

Univariate analysis: Sex, previous CAD, CKD, basal NYHA, 3 months HF previous admission, previous red blood cells transfusion (yes/no), basal hemoglobin, basal LDH, STS score, EuroScore I, HF vs HA indication, PVL location, technical success, procedural

success, procedural complications, in-hospital complications, NYHA IV functional class 90 days after PVL closure, NYHA improve at 90 days and follow-up and red blood cells transfusion (yes/no) in follow-up.

**Supplementary Table S3: Predictors of death during long-term follow-up:**

|                                                    | P value | HR  | 95% Conf. Interval |
|----------------------------------------------------|---------|-----|--------------------|
| 3 months HF previous admission                     | 0.000   | 7.0 | 2.7 – 16.5         |
| NYHA IV functional class 90 days after PVL closure | 0.030   | 4.5 | 1.2 – 17.4         |
| Improve NYHA class at follow-up                    | 0.004   | 0.2 | 0.1 – 0.6          |
| HF vs HA indication                                | 0.000   | 6.7 | 2.7 – 16.6         |

Univariate analysis: Previous CAD, basal NYHA, 3 months HF previous admission, previous red blood cells transfusion (yes/no), basal hemoglobin, basal LDH, STS score, EuroScore I, HF vs HA indication, PVL location, technical success, procedural success, procedural complications, in-hospital complications, NYHA improve at 90 days and follow-up, NYHA IV functional class 90 days after PVL closure and red blood cells transfusion (yes/no) in follow-up.

**Supplementary Figure S1**

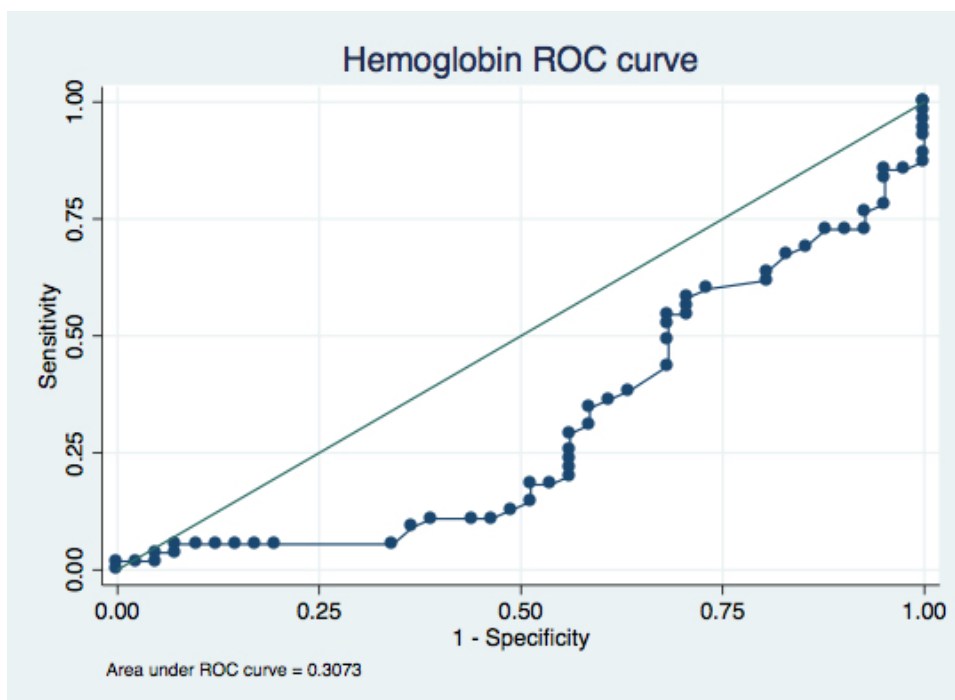

Supplementary Figure S2

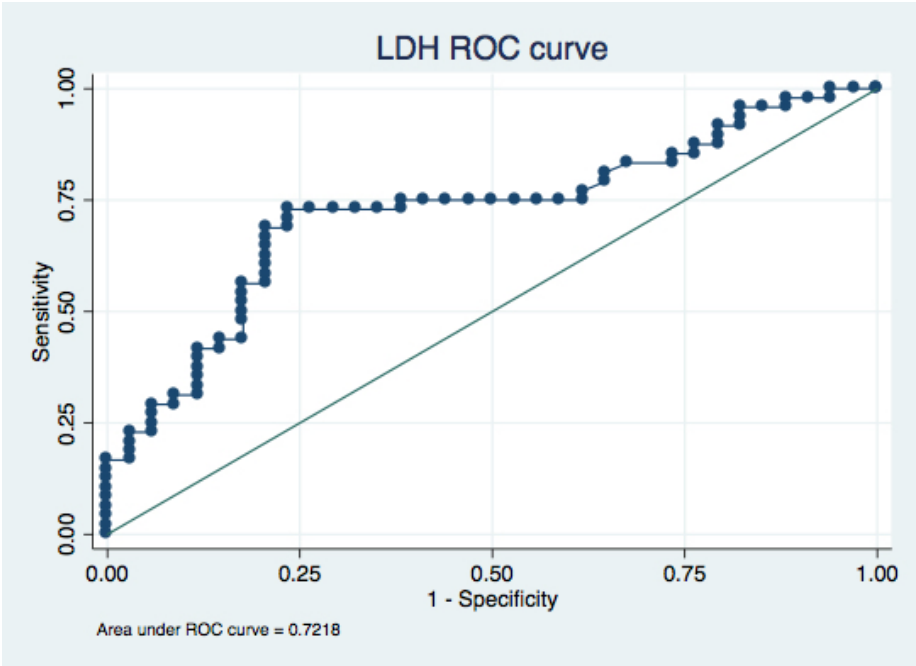

Supplement: s1 [file s1]
